# Supplementary material
Source: ML conference proceedings conference paper supplement (https://proceedings.neurips.cc/paper_files/paper/2018/hash/d54e99a6c03704e95e6965532dec148b-Abstract.html)
Supplement: Supplementary file [file d54e99a6c03704e95e6965532dec148b-Supplemental.zip]

---

# Lipschitz regularity of deep neural networks: analysis and efficient estimation

## SUPPLEMENTARY MATERIAL

---

**Kevin Scaman**  
Huawei Noah's Ark Lab  
kevin.scaman@huawei.com

**Aladin Virmaux**  
Huawei Noah's Ark Lab  
aladin.virmaux@huawei.com

### Abstract

This supplementary material contains proof of the theorems of the submission “Lipschitz regularity of deep neural networks: analysis and efficient estimation”, as well as more details on the parameters used for the experiments.

### 1 Proof of Theorem 2

We reduce the problem of maximizing a quadratic convex function on a hypercube to **LIP-CST**. Start from the following **NP**-hard problem [1, Quadratic Optimization, Section 4]:

$$\begin{aligned} & \underset{\sigma}{\text{maximize}} && \sum_i (h_i^\top \sigma)^2 = \sigma^\top H \sigma \\ & \text{s. t.} && \forall k, 0 \leq \sigma_k \leq 1, \end{aligned} \tag{1}$$

where  $H = \sum_i h_i h_i^\top$  is a positive semi-definite matrix with full rank. Let's note

$$M_1 = \left( \begin{array}{c|c|c|c} h_1 & h_2 & \cdots & h_n \end{array} \right), \quad M_2 = \left( \begin{array}{c|c} \begin{array}{c} 1 \\ \vdots \\ 1 \end{array} & 0 \end{array} \right)$$

so that we have

$$M_2 \text{diag}(\sigma) M_1 = \left( \begin{array}{c|c} \begin{array}{c} h_1^\top \sigma \\ \vdots \\ h_n^\top \sigma \end{array} & 0 \end{array} \right).$$

The spectral norm of this 1-rank matrix is  $\sum_i (h_i^\top \sigma)^2$ . We proved that Eq. (1) is equivalent to the following optimization problem

$$\begin{aligned} & \underset{\sigma}{\text{maximize}} && \|M_2 \text{diag}(\sigma) M_1\|_2^2 \\ & \text{s. t.} && \sigma \in [0, 1]^n. \end{aligned} \tag{2}$$

We recover the exact formulation of Section 6 Eq. (6) for a 2-layer MLP (the reader can verify there is no recursive loop). Because  $H$  is full rank,  $M_1$  is surjective and all  $\sigma$  are admissible values for  $g'_i(x)$  which is the equality case. Finally, ReLU activation units take their derivative within  $\{0, 1\}$  and Eq. (2) is its relaxed optimization problem, that has the same optimum points.

## 2 Proof of Theorem 3

Consider a single factor  $\left\| \tilde{\Sigma} V \text{diag}(\sigma) U^\top \tilde{\Sigma}' \right\|_2$  with  $V$  and  $U$  unitary matrices and  $\tilde{\Sigma}$  (resp.  $\tilde{\Sigma}'$ ) is diagonal with eigenvalues  $(s_k)_k$  (resp.  $(s'_j)_j$ ) in decreasing order along the diagonal. Decompose the eigenvalue matrices as  $\tilde{\Sigma} = s_1 E_{11} + D$  and  $\tilde{\Sigma}' = s'_1 E'_{11} + D'$ , by orthogonality we can write

$$\begin{aligned} \left\| \tilde{\Sigma} V \text{diag}(\sigma) U^\top \tilde{\Sigma}' \right\|_2^2 &\leq \left\| s_1 E_{11} V \text{diag}(\sigma) U^\top E'_{11} s'_1 \right. \\ &\quad + s_1 E_{11} V_i \text{diag}(\sigma) U^\top D' \\ &\quad + D V \text{diag}(\sigma) U^\top E'_{11} s'_1 \left. \right\|_2^2 \\ &\quad + \left\| D V \text{diag}(\sigma) U^\top D' \right\|_2^2. \end{aligned} \quad (3)$$

First we can bound (4)  $\leq (s_2 s'_2)^2$ . For (3) denote  $v_k$  (resp.  $u_k$ ) the  $k$ -th column of  $V$  (resp. of  $U$ ). It follows that

$$(3) \leq (s_1 s'_1)^2 \langle v_1, \sigma \cdot u_1 \rangle^2 + \sum_{j>1} (s_1 s'_j)^2 \langle v_1, \sigma \cdot u_j \rangle^2 + \sum_{k>1} (s_k s'_1)^2 \langle v_k, \sigma \cdot u_1 \rangle^2.$$

The columns  $(v_k)_k$  of  $V$  form an orthonormal basis so we have

$$\sum_{k>1} \langle v_k, \sigma \cdot u_1 \rangle^2 = \|\sigma \cdot u_1\|^2 - \langle v_1, \sigma \cdot u_1 \rangle^2,$$

and we deduce a similar equality for  $\sum_{j>1} \langle v_1, \sigma \cdot u_j \rangle^2$ . Using  $s_k \leq s_2$  for  $k > 1$  we finally obtain

$$(3) \leq (s_1 s'_1)^2 \left( \langle v_1, \sigma \cdot u_1 \rangle^2 (1 - \tilde{r}_1 - \tilde{r}_2) + \tilde{r}_1 + \tilde{r}_2 \right),$$

with  $\tilde{r}_1 = (\frac{s_2}{s_1})^2$  and  $\tilde{r}_2 = (\frac{s'_2}{s'_1})^2$ . In conclusion we proved the following inequality:

$$\left\| \tilde{\Sigma} V \text{diag}(\sigma) U^\top \tilde{\Sigma}' \right\|_2^2 \leq (s_1 s'_1)^2 \left( (1 - \tilde{r}_1 - \tilde{r}_2) \langle v_1, \sigma \cdot u_1 \rangle^2 + \tilde{r}_1 + \tilde{r}_2 + \tilde{r}_1 \tilde{r}_2 \right).$$

The Lipschitz upper bound given by AutoLip of  $\left\| \tilde{\Sigma}_1 V \text{diag}(\sigma) U^\top \tilde{\Sigma}_2 \right\|_2$  is  $s_1 s'_1$ . For the middle layers, we have  $\tilde{\Sigma} = \Sigma^{1/2}$ , and the inequality still holds for the first and last layer due to  $\tilde{r}_i \leq \frac{s_2}{s_1}$ ; taking the maximum for  $\sigma$  leads to the theorem.

## 3 Proof of Lemma 2

Let  $U, V \sim \mathcal{N}(0, I_n)$  be two independent  $n$ -dimensional Gaussian random vectors. Then,  $u = U/\|U\|_2$  and  $v = V/\|V\|_2$  are uniform on the unit sphere  $S^{n-1}$ , and

$$\begin{aligned} \max_{\sigma \in [0,1]^n} |\langle \sigma \cdot u, v \rangle| &= \max_{\sigma \in [0,1]^n} \left| \sum_{i=1}^n \sigma_i u_i v_i \right| \\ &= \max \left\{ \sum_{i=1}^n (u_i v_i)^+, \sum_{i=1}^n (u_i v_i)^- \right\}, \end{aligned} \quad (5)$$

where  $x^+ = \max\{0, x\}$  and  $x^- = \max\{0, -x\}$  are respectively the positive and negative parts of  $x$ . Note that  $\sum_{i=1}^n (u_i v_i)^+$  and  $\sum_{i=1}^n (u_i v_i)^-$  have the same law, since the distribution of  $u$  and  $v$  is symmetric w.r.t. the coordiante axes. Moreover, we may rewrite

$$\sum_{i=1}^n (u_i v_i)^+ = \frac{\frac{1}{n} \sum_{i=1}^n (U_i V_i)^+}{\sqrt{\frac{1}{n} \sum_{i=1}^n U_i^2} \sqrt{\frac{1}{n} \sum_{i=1}^n V_i^2}}, \quad (6)$$

and each term converges almost surely to its expectation due to the strong law of large numbers. Finally, noting that  $\mathbb{E}[U_i^2] = \mathbb{E}[V_i^2] = 1$  and

$$\mathbb{E}[(U_i V_i)^+] = \frac{1}{2} \mathbb{E}[|U_i V_i|] = \frac{1}{2} \mathbb{E}[|U_i|] \mathbb{E}[|V_i|] = \frac{1}{\pi}, \quad (7)$$

leads to the desired result.

## 4 Convolutional Neural Network of Section 7

For each model of depth  $n$ , convolution except the last one are followed by a ReLU activation unit.

| # Layer  | Layer         | # channels out | kernel   | stride   | padding  |
|----------|---------------|----------------|----------|----------|----------|
| 1        | Conv2D + bias | 32             | (5, 5)   | 2        | 0        |
| 2        | Conv2D + bias | 64             | (3, 3)   | 2        | 0        |
| 3        | Conv2D + bias | 64             | (3, 3)   | 1        | 1        |
| $\vdots$ | $\vdots$      | $\vdots$       | $\vdots$ | $\vdots$ | $\vdots$ |
| $\vdots$ | Conv2D + bias | 64             | (3, 3)   | 1        | 1        |
| $\vdots$ | $\vdots$      | $\vdots$       | $\vdots$ | $\vdots$ | $\vdots$ |
| $n - 1$  | Conv2D + bias | 128            | (3, 3)   | 2        | 0        |
| $n$      | Conv2D + bias | 10             | (2, 2)   | 1        | 0        |

## References

- [1] Reiner Horst and Panos M Pardalos. *Handbook of global optimization*, volume 2. Springer Science & Business Media, 2013.
